# Supplementary material for: Compression-Complexity Measures for Analysis and Classification of Coronaviruses
Source: Entropy (Basel). 2022 Dec 31;25(1):81. doi: 10.3390/e25010081 (PMC9857615; doi:10.3390/e25010081)
Supplement: Supplementary file 1 [file entropy-25-00081-s001.zip]

Archive with 8 entries (8 files):
- Covid19_ETC_DistanceMatrix.csv
- Covid19_LZC_DistanceMatrix.csv
- Mammals_ETC_DistanceMatrix.csv
- Mammals_LZC_DistanceMatrix.csv
- SARS_ETC_DistanceMatrix.csv
- SARS_LZC_DistanceMatrix.csv
- Supplementary_Resource 1.pdf
- Supplementary_Resource 2.pdf
