# Supplementary material for: Compression-Complexity Measures for Analysis and Classification of Coronaviruses
Source: Entropy (Basel). 2022 Dec 31;25(1):81. doi: 10.3390/e25010081 (PMC9857615; doi:10.3390/e25010081)
Supplement: Supplementary file 1 [file entropy-25-00081-s001.zip › Covid19_ETC_DistanceMatrix.csv]

Distance Matrix of Covid-19 and non-Covid-19 viruses using ETC measure
	hCoV19 1	hCoV19 2	hCoV19 3	hCoV19 4	hCoV19 5	hCoV19 6	hCoV19 7	hCoV19 8	hCoV19 9	hCoV19 10	hCoV19 11	hCoV19 12	hCoV19 13	hCoV19 14	hCoV19 15	hCoV19 16	hCoV19 17	hCoV19 18	hCoV19 19	hCoV19 20	hCoV19 21	hCoV19 22	hCoV19 23	hCoV19 24	hCoV19 25	hCoV19 26	hCoV19 27	hCoV19 28	hCoV19 29	hCoV19 30	Alpha CoV 1	Alpha CoV 2	Alpha CoV 3	Alpha CoV 4	Alpha CoV 5	Alpha CoV 6	Alpha CoV 7	Beta CoV 1	Beta CoV 2	Beta CoV 3	Beta CoV 4	Beta CoV 5	Beta CoV 6	Beta CoV 7	Beta CoV 8	Beta CoV 9	Beta CoV 10	Gamma CoV 1	Gamma CoV 2
hCoV19 1
hCoV19 2	0.02211913
hCoV19 3	0.01456028	0.0173766
hCoV19 4	0.00346457	0.0242011	0.01613634
hCoV19 5	0.01667154	0.01555721	0.02316752	0.01824585
hCoV19 6	0.01509605	0.01109877	0.0216062	0.01667287	0.02110207
hCoV19 7	0.01111597	0.01242492	0.02238347	0.01270157	0.02133942	0.02003012
hCoV19 8	0.0090339	0.01792469	0.01559737	0.01062026	0.01953984	0.01770835	0.01427252
hCoV19 9	0.00824883	0.02733001	0.02164553	0.0098385	0.02296699	0.01773241	0.01481344	0.01537275
hCoV19 10	0.01168377	0.02964334	0.01901727	0.01326739	0.02633955	0.02321496	0.01718075	0.01457413	0.01432823
hCoV19 11	0.02272468	0.0249866	0.03513088	0.02429242	0.03282984	0.03024281	0.02635951	0.02687856	0.024303	0.03338804
hCoV19 12	0.01899761	0.01918483	0.01634044	0.02108748	0.01215221	0.01110074	0.01085529	0.02549084	0.02422581	0.0265509	0.02239796
hCoV19 13	0.01453542	0.01368986	0.00898768	0.0166317	0.00899193	0.0071474	0.00582956	0.01110747	0.0218655	0.02315331	0.01820635	0.01474672
hCoV19 14	0.01767141	0.01368269	0.00898463	0.01976028	0.00951556	0.00477092	0.01792568	0.02026083	0.02289775	0.02522095	0.01976568	0.01578382	0.00476234
hCoV19 15	0.0071834	0.02393504	0.01979965	0.00877348	0.01955084	0.01561769	0.01375657	0.01351922	0.01353563	0.01694957	0.02533072	0.02056058	0.01871907	0.01949423
hCoV19 16	0.02737479	0.03036954	0.03300526	0.02893281	0.03483479	0.02811629	0.02839662	0.02787024	0.03050307	0.02970742	0.03720912	0.03657106	0.0257092	0.03343682	0.02866644
hCoV19 17	0.03046826	0.02803798	0.02443852	0.03253905	0.02522876	0.01949318	0.01378016	0.03276821	0.03616782	0.03846624	0.02970132	0.02702594	0.02414717	0.02387594	0.03201523	0.04097661
hCoV19 18	0.01062902	0.01689846	0.02320296	0.01221459	0.02530495	0.02008405	0.01718202	0.01773208	0.01063361	0.01616644	0.02768434	0.01559457	0.00980499	0.0111188	0.01590157	0.03230454	0.02319062
hCoV19 19	0.01008873	0.0226074	0.01768784	0.01167294	0.01822497	0.01691648	0.01426387	0.01245398	0.01641996	0.01955653	0.02556742	0.02340068	0.00820633	0.00186511	0.01272451	0.02967394	0.03094427	0.01929953
hCoV19 20	0.01403931	0.02337464	0.02003164	0.01561691	0.02109221	0.01690913	0.02915676	0.01612851	0.02034644	0.02372788	0.02971339	0.02546603	0.00688312	0.01371228	0.01456155	0.0325033	0.03351094	0.02269038	0.01297085
hCoV19 21	0.0304056	0.02460174	0.02438818	0.03246992	0.02076858	0.01764212	0.01844771	0.03218122	0.03454772	0.03786494	0.02808446	0.02694902	0.02226636	0.01940109	0.03065597	0.03882627	0.03214666	0.02445143	0.02207526	0.03034654
hCoV19 22	0.015107	0.02755993	0.02501107	0.01668497	0.02555009	0.02398967	0.02084432	0.02007986	0.02141525	0.02531937	0.03389329	0.02783571	0.02210172	0.0265053	0.01825628	0.03512447	0.03742061	0.02376002	0.01876411	0.02345878	0.03810509
hCoV19 23	0.03813531	0.03669582	0.03650984	0.03992913	0.0434423	0.03731226	0.02625905	0.0337344	0.04378494	0.04554138	0.03916715	0.03236502	0.03078981	0.02768397	0.0363291	0.03781119	0.0439286	0.02964142	0.03910839	0.04036636	0.04024228	0.0411864
hCoV19 24	0.01927815	0.02049696	0.02574392	0.02084708	0.02550667	0.02602932	0.02861256	0.01873833	0.02555401	0.03098502	0.03486596	0.01842191	0.0118704	0.01029131	0.02214667	0.03428684	0.02364423	0.02840166	0.01820891	0.02159434	0.02412074	0.02812468	0.0262006
hCoV19 25	0.00532327	0.0129486	0.01428462	0.00691511	0.01508245	0.01376906	0.01110707	0.0087625	0.01168217	0.0151004	0.02166113	0.01845664	0.01163335	0.01215468	0.00797314	0.02657198	0.02707043	0.01405104	0.00849535	0.01139505	0.0202636	0.01562095	0.03579111	0.01611916
hCoV19 26	0.01427391	0.01395798	0.01266536	0.01637199	0.01214521	0.00740624	0.00663144	0.02053541	0.0195203	0.02185744	0.01821104	0.01082437	0.00897632	0.00949714	0.01584418	0.031924	0.02234448	0.00821976	0.01817675	0.01973211	0.02227834	0.02262803	0.03132021	0.01475252	0.01373437
hCoV19 27	0.01247725	0.03351992	0.02554415	0.01405989	0.02504114	0.02556448	0.02164251	0.01956549	0.01722598	0.02167397	0.03261489	0.0304415	0.0260144	0.02910988	0.01773961	0.03514211	0.04129507	0.02115536	0.0206061	0.02451291	0.04170991	0.02558307	0.04834493	0.02969428	0.01589122	0.0257627
hCoV19 28	0.01978618	0.01945671	0.01739022	0.02239787	0.01765849	0.01267549	0.0092839	0.02523984	0.02449275	0.02682031	0.02031698	0.01633984	0.01475518	0.0150098	0.0213495	0.0340183	0.02289092	0.0105955	0.01661878	0.02339542	0.0251555	0.02784585	0.03187024	0.01972962	0.01924498	0.01161933	0.03174729
hCoV19 29	0.00584852	0.00950851	0.01189988	0.00743723	0.01375102	0.01375271	0.01397733	0.00769489	0.01219679	0.01508077	0.02580059	0.00713873	0	0.00106217	0.01060432	0.02575279	0.01581057	0.01508522	0.00901283	0.01216905	0.01370141	0.01743628	0.03444904	0.01609757	0.00610783	0.00343605	0.01639574	0.00818822
hCoV19 30	0.01693361	0.02234931	0.02420751	0.01903166	0.02578421	0.02213988	0.01744003	0.01770555	0.02374802	0.02399533	0.02530568	0.01452591	0.01084189	0.00952408	0.0195511	0.03199991	0.02446944	0.02556452	0.01926927	0.02135006	0.02259649	0.02892674	0.04675508	0.02524063	0.01481872	0.00952801	0.02478012	0.01111344	0.01715406
Alpha CoV 1	0.98998852	0.98572502	0.98659783	0.98998852	0.98822101	0.98882177	0.98358876	0.9878581	0.99101957	0.98938943	0.98935338	0.9863993	0.9846792	0.98381732	0.98985226	0.9850879	0.98445897	0.98937454	0.9896387	0.98785964	0.98289672	0.99071232	0.98372715	0.98822588	0.98945064	0.98582205	0.98816701	0.98471065	0.98777121	0.98565789
Alpha CoV 2	0.99417482	0.9909701	0.99313755	0.99417482	0.99475949	0.99392029	0.98913345	0.99447237	0.99588919	0.99418212	0.99467566	0.99042665	0.98992458	0.98959581	0.99615903	0.99368119	0.9888601	0.99431928	0.99382631	0.99356401	0.99004739	0.99399068	0.99277209	0.99687682	0.99318156	0.98954353	0.99674904	0.98987725	0.99634966	0.99371758	0.47992027
Alpha CoV 3	0.9880748	0.98380853	0.98688244	0.98823872	0.98933455	0.98865553	0.98042169	0.98826032	0.98610111	0.99112039	0.98826911	0.98355755	0.98409194	0.98425884	0.9871313	0.98728156	0.97831278	0.99124241	0.98829068	0.990227	0.97961472	0.98747047	0.98087417	0.98264366	0.98752574	0.98348086	0.98536349	0.98128631	0.98945263	0.98536705	0.99116801	0.99006282
Alpha CoV 4	0.99086004	0.98826842	0.98951871	0.99086004	0.99159752	0.99060294	0.98705134	0.9915397	0.99356424	0.99223638	0.98907846	0.98726673	0.98676333	0.98612932	0.99254819	0.99014263	0.98585304	0.9928284	0.99005455	0.99032473	0.98650522	0.99143614	0.98946548	0.9927391	0.99039796	0.98623023	0.99291185	0.98625911	0.99236092	0.98918943	0.47529859	0.02031275	0.98552682
Alpha CoV 5	0.98873725	0.98462374	0.98754793	0.98873725	0.9890175	0.99022822	0.97868468	0.98804662	0.98877974	0.98859302	0.98741323	0.98346278	0.98602047	0.98347325	0.98829647	0.98588375	0.98135053	0.98689334	0.98869266	0.9865967	0.98369615	0.98923865	0.98559694	0.99077235	0.98827487	0.98449571	0.98843178	0.98137313	0.98925265	0.98745165	0.48522318	0.41017476	0.98513169	0.40736491
Alpha CoV 6	0.99317867	0.98975257	0.99153404	0.99188776	0.9930778	0.991478	0.98915612	0.99264162	0.99101946	0.99379265	0.99026134	0.98898267	0.98916365	0.98815019	0.9915997	0.98941979	0.98940697	0.99096693	0.99343464	0.99256588	0.98806843	0.99246264	0.98874432	0.99255134	0.99294395	0.98855776	0.99272338	0.98706211	0.99217289	0.99143536	0.58635576	0.54286206	0.99425211	0.53913862	0.47624331
Alpha CoV 7	0.9904384	0.98591834	0.98999432	0.99027179	0.99005307	0.98969069	0.98587279	0.99071587	0.99084295	0.98962884	0.98805963	0.9871683	0.98612609	0.98638524	0.99056753	0.9890776	0.98665933	0.99423402	0.98991353	0.99047529	0.98735288	0.99015885	0.98619581	0.98901882	0.989887	0.98643211	0.98868666	0.98838836	0.98959976	0.99021967	0.98506167	0.99297738	0.93988996	0.98974026	0.98474747	0.99139683
Beta CoV 1	0.99033914	0.98653154	0.98808186	0.99033914	0.9911515	0.99114441	0.98044912	0.98835128	0.99045874	0.99019491	0.99069476	0.98337771	0.98670443	0.98675752	0.99081308	0.98595606	0.98187661	0.98712015	0.99037023	0.9841391	0.98652211	0.99045886	0.98589971	0.98612268	0.98720296	0.98479531	0.98712882	0.98313348	0.98772953	0.98890006	0.49007967	0.41808597	0.98903741	0.41594033	0.02001171	0.47962276	0.98567865
Beta CoV 2	0.9828078	0.98569022	0.98968387	0.9869697	0.99092362	0.99266575	0.98477962	0.9923916	0.99129726	0.98513288	0.98092311	0.97951035	0.98716504	0.98729491	0.99134806	0.98687275	0.98848569	0.98688388	0.99037057	0.99489199	0.98774614	0.99312357	0.98597559	0.99275334	0.99079216	0.98824042	0.99026273	0.98681979	0.99054946	0.99103774	0.09338447	0.46081726	0.99442248	0.45343919	0.45918948	0.57133555	0.99128172	0.46952239
Beta CoV 3	0.99308913	0.98928823	0.99205375	0.99308913	0.99336863	0.99312712	0.9875402	0.99278065	0.99289295	0.99070196	0.9919915	0.98842692	0.98876949	0.98820913	0.9924924	0.99092158	0.98934156	0.99230616	0.99227504	0.99000046	0.98734609	0.99282527	0.98879815	0.99160682	0.99193093	0.98847086	0.99278028	0.98819144	0.99214713	0.99219896	0.98998506	0.9977207	0.98639475	0.98881634	0.9831607	0.9887789	0.98987327	0.9852317	0.98774187
Beta CoV 4	0.9877415	0.98339292	0.98472998	0.9875898	0.98764638	0.98839806	0.98337669	0.98652223	0.98801669	0.98790021	0.98695057	0.9841411	0.98356402	0.98315915	0.98768045	0.98489201	0.98394507	0.98667157	0.98754534	0.98667675	0.98300263	0.98710264	0.98352891	0.98704482	0.98750726	0.98325761	0.98698261	0.98359005	0.98651489	0.98629515	0.98132976	0.989737	0.97695273	0.98631578	0.98084347	0.98657964	0.98884746	0.98305833	0.98348131	0.99091925
Beta CoV 5	0.98737816	0.9820168	0.98215077	0.98706846	0.98688921	0.98680149	0.97811566	0.98521044	0.98950065	0.98552828	0.99060315	0.98286006	0.98297304	0.98774695	0.9870897	0.98497334	0.98229212	0.98309432	0.98996095	0.9810912	0.97842668	0.98765627	0.98393409	0.98255899	0.98225294	0.9825933	0.98691356	0.97957779	0.98209177	0.98080683	0.98494879	0.99314235	0.97664231	0.98899827	0.98807375	0.98029595	0.9808547	0.98899471	0.98474448	0.95906112	0.98566759
Beta CoV 6	0.99110001	0.98566513	0.9883249	0.99093366	0.98904927	0.98943632	0.98646127	0.9892963	0.99150424	0.99079102	0.98947662	0.98708227	0.9851206	0.98437709	0.99106251	0.99131891	0.98623977	0.99140891	0.98890967	0.98822254	0.98518021	0.99115286	0.98819247	0.98943035	0.98888294	0.98701416	0.98976792	0.98888576	0.98884595	0.98971659	0.98974673	0.99214713	0.94061095	0.98874648	0.98333877	0.99437082	0.0620143	0.98525424	0.9898827	0.99292283	0.99019474	0.97942754
Beta CoV 7	0.9888499	0.98499602	0.98765711	0.98868293	0.98904854	0.98985175	0.98528629	0.98862867	0.98942141	0.99029099	0.98788953	0.98658119	0.98486959	0.98504614	0.98906312	0.9906539	0.9856538	0.98982678	0.98882569	0.98955496	0.98584829	0.98882063	0.98760939	0.99026066	0.98846531	0.98542692	0.99051691	0.98646599	0.99017581	0.98687916	0.98957954	0.99262816	0.94024798	0.98857878	0.9840736	0.99355817	0.05591787	0.98525022	0.98995984	0.99259107	0.99010788	0.97959386	0.00834043
Beta CoV 8	0.9886962	0.98353072	0.98622701	0.988856	0.98786841	0.98817059	0.98303009	0.9881511	0.98927313	0.98719172	0.98685737	0.98432067	0.98396256	0.98355563	0.98816742	0.98626887	0.98368173	0.98915995	0.98730731	0.98768137	0.98313576	0.98610556	0.98333731	0.98693935	0.98791227	0.98422542	0.98813655	0.98360835	0.9874983	0.98615358	0.98829	0.99606631	0.97850954	0.99401321	0.98389656	0.9914927	0.98120714	0.98652206	0.98833048	0.987625	0.98619428	0.98525788	0.97887807	0.97923084
Beta CoV 9	0.99152655	0.98608261	0.99016732	0.9913599	0.99014345	0.99202932	0.98770395	0.99088864	0.99193172	0.99138361	0.9909835	0.98632831	0.98637462	0.98646767	0.99182204	0.99157979	0.987404	0.99075242	0.9910026	0.99064936	0.98735399	0.99033028	0.98803304	0.99135746	0.99005815	0.98617652	0.99102645	0.98930364	0.99035732	0.99038962	0.99016759	0.99710008	0.94418882	0.99330059	0.99003165	0.99777209	0.06477085	0.98949663	0.99378042	0.99559422	0.9910306	0.98145229	0.06243019	0.0557404	0.98243009
Beta CoV 10	0.99389578	0.99037759	0.99328377	0.99372963	0.99483773	0.9949748	0.99050373	0.99417143	0.99430065	0.99508077	0.99252234	0.99278578	0.9898347	0.99000873	0.99402392	0.99518815	0.99095044	0.99387238	0.99395215	0.99451095	0.9905586	0.99369967	0.99223107	0.99504769	0.99351081	0.99047237	0.99555476	0.99134191	0.99446682	0.99176148	0.9935378	0.99716124	0.94669403	0.99262882	0.98771875	0.99751262	0.06888775	0.98930541	0.99432414	0.9952297	0.99470869	0.98341193	0.00959082	0.00928504	0.98296207	0.07392453
Gamma CoV 1	0.98993879	0.98591705	0.98849588	0.98977195	0.990221	0.99069107	0.98938819	0.98963414	0.99051043	0.99137872	0.98856042	0.98800186	0.98570692	0.98605044	0.98990149	0.99149095	0.98648878	0.99108164	0.98983122	0.99039365	0.98685236	0.9897428	0.98828011	0.990435	0.98938742	0.98651412	0.9911886	0.98713439	0.99051637	0.98763334	0.99091706	0.99429313	0.94219848	0.98967627	0.98533436	0.99505547	0.06351897	0.9869207	0.9913785	0.99359714	0.99192793	0.98144217	0.01864478	0.01592682	0.9807526	0.06103896	0.02203319
Gamma CoV 2	0.98523685	0.980136	0.98364067	0.98523685	0.98374129	0.98485755	0.97957582	0.98501362	0.98840583	0.9847677	0.98792628	0.98004199	0.98041517	0.98350409	0.98470406	0.98410054	0.98030834	0.98505586	0.98456111	0.98340002	0.98120639	0.98447732	0.98180748	0.9885539	0.98460919	0.980446	0.98783094	0.98055312	0.9853205	0.98317326	0.98887658	0.99250835	0.9802175	0.98844299	0.98710515	0.99334863	0.98453967	0.98767136	0.9924254	0.98727408	0.99070444	0.99112816	0.98403715	0.98404438	0.99364201	0.98695709	0.98766076	0.98555559
Gamma CoV 3	0.99540355	0.99034437	0.99452998	0.99540355	0.99520479	0.99423408	0.99093519	0.99509601	0.99581794	0.9955779	1	0.99169392	0.9911713	0.99044598	0.99479848	0.99251157	0.9894787	0.9952291	0.99488998	0.99414705	0.9897089	0.99481565	0.99070465	0.9940392	0.99501784	0.99048335	0.99492681	0.99067689	0.99451488	0.99351553	0.98466383	0.99222868	0.98302575	0.98806788	0.98275053	0.99287468	0.99064268	0.9840404	0.98277709	0.98560246	0.98902675	0.99418728	0.98583629	0.98601438	0.9705452	0.99374044	0.98998356	0.99395908	0.98819918
Gamma CoV 4	0.9918599	0.98643156	0.9902052	0.9918599	0.99035734	0.99011317	0.98640336	0.98992366	0.99251234	0.99140632	0.99146049	0.98828892	0.98769923	0.987992	0.99134002	0.98946005	0.98500577	0.99239061	0.99204916	0.99116615	0.98658284	0.98755519	0.98803533	0.99114545	0.99139645	0.98724767	0.99030936	0.98782473	0.99013917	0.99089789	0.49443166	0.07823702	0.98300109	0.07240448	0.42581771	0.53865811	0.98798699	0.43598852	0.4693793	0.98764605	0.98532252	0.98572679	0.9873998	0.98739906	0.99175006	0.99115426	0.9914447	0.9895684	0.98571705
Gamma CoV 5	0.99034122	0.9865507	0.98801179	0.98895762	0.99046647	0.98995729	0.98198555	0.98922308	0.99091621	0.98897667	0.98562384	0.98654159	0.98634065	0.9864218	0.99013407	0.98512831	0.98173314	0.99056624	0.9908005	0.9897214	0.98680475	0.98803271	0.98618273	0.98952922	0.98987564	0.98572271	0.98585294	0.98222603	0.98960943	0.98844455	0.98140024	0.98715747	0.98970385	0.98785357	0.9781619	0.98179866	0.98479627	0.9862823	0.98630166	0.99002231	0.99017494	0.98741173	0.98543594	0.98561993	0.97617266	0.98589987	0.98906235	0.98678284	0.99149079
Gamma CoV 6	0.98803858	0.98440754	0.98894481	0.9870682	0.9884872	0.98838617	0.98370172	0.98773332	0.98845238	0.98813712	0.98821291	0.98447922	0.98273834	0.98379027	0.98734587	0.98738589	0.98336622	0.98818241	0.98849346	0.98830725	0.98417274	0.98760545	0.98574187	0.98972716	0.98749259	0.98390478	0.98852317	0.98442011	0.98932433	0.98670769	0.99074907	0.99235281	0.98514484	0.98954231	0.98598851	0.99185503	0.99011369	0.98639882	0.98989538	0.98805182	0.99156175	0.9964699	0.99193816	0.99082569	0.99854433	0.9920917	0.99511613	0.99267203	0.70781817
Delta CoV 1	0.9966698	0.98832495	0.99179671	0.9966698	0.99326454	0.99139786	0.98676249	0.99284173	0.99243614	0.99524924	0.99091352	0.98912642	0.98916233	0.98778896	0.9951056	0.99097104	0.98714405	0.99521488	0.99303316	0.99420703	0.98873273	0.99239469	0.99141452	0.99361346	0.99548518	0.99209027	0.99635061	0.99004129	0.99473148	0.98949207	0.98847167	0.99523614	0.98145496	0.99087008	0.98654034	0.99420031	0.98737208	0.98979062	0.99289193	0.99072206	0.98733012	0.9915261	0.98851982	0.98887314	0.98813838	0.9893494	0.99239031	0.99037722	0.73762796
Delta CoV 2	0.98988986	0.98529488	0.98845723	0.98988986	0.98928721	0.98999127	0.98541355	0.98845497	0.99110787	0.98974635	0.99159399	0.98520603	0.9857318	0.98564769	0.9892795	0.9885928	0.98531534	0.99003337	0.98913331	0.99007373	0.98352151	0.99010118	0.9879155	0.98827263	0.98926319	0.98495628	0.98924486	0.98620146	0.98899678	0.98775515	0.9943025	0.99412597	0.98622275	0.99053831	0.98422292	0.99222192	0.98576977	0.98605805	0.98647552	0.99204581	0.99090996	0.98438493	0.98526762	0.98649086	0.98824458	0.99095553	0.99096769	0.98747866	0.72295507
Delta CoV 3	0.99150859	0.98643876	0.99071696	0.99166833	0.99083171	0.99145168	0.98622243	0.9910421	0.99256142	0.99200389	0.98975735	0.98731364	0.98727143	0.9863035	0.99122094	0.98876803	0.98677357	0.99117264	0.9907555	0.99008946	0.98556091	0.99059864	0.98688133	0.99101938	0.99072386	0.98440874	0.99166833	0.98653087	0.99030041	0.99025719	0.98898774	0.99170248	0.98641897	0.98723499	0.98247917	0.98883963	0.99111109	0.98463488	0.98425164	0.98319078	0.98639455	0.99126006	0.98717508	0.98718039	0.97054979	0.99146537	0.99088196	0.98454529	0.98739734
Delta CoV 4	0.98907137	0.98366514	0.987801	0.98698059	0.98855634	0.99045997	0.98738975	0.98804309	0.98996779	0.98715862	0.99020242	0.98454158	0.98385838	0.98409597	0.98588528	0.9893733	0.98697533	0.98647999	0.98735443	0.9853973	0.98616619	0.98904183	0.98459539	0.99162492	0.98764258	0.9838856	0.98858955	0.98681373	0.98850653	0.98644965	0.99014433	0.99255086	0.98768098	0.98792696	0.98317103	0.98890385	0.9922905	0.9852478	0.98518035	0.98420338	0.98794347	0.99186639	0.98655021	0.98776216	0.97014027	0.99410042	0.99155033	0.99072958	0.98824089
Delta CoV 5	0.9948961	0.99102407	0.99224639	0.99465309	0.99477849	0.99524252	0.98614188	0.99329411	0.99563294	0.99313019	0.98970417	0.99101506	0.9908141	0.99073136	0.99468873	0.98945179	0.98589269	0.99528272	0.99527149	0.99411464	0.99103278	0.99267714	0.99065837	0.99384286	0.9943497	0.99027829	0.99001656	0.98638555	0.99440821	0.99283758	0.98574598	0.99158531	0.99370529	0.99099345	0.98275556	0.9860714	0.98985755	0.99085148	0.99102883	0.99466113	0.99426104	0.99003757	0.99014224	0.99032485	0.98094555	0.99079097	0.99385565	0.99078876	0.98623734
Delta CoV 6	0.99044038	0.98803167	0.98965699	0.99044038	0.99210996	0.99143943	0.98371682	0.99078646	0.9910161	0.99054063	0.98719129	0.98794106	0.98790304	0.98773962	0.99055855	0.98677682	0.98346487	0.99220981	0.99236202	0.99128398	0.98812253	0.98951637	0.98774583	0.99084884	0.991357	0.98720384	0.98742083	0.98379303	0.99044201	0.98976307	0.98313261	0.98873066	0.99125197	0.98510848	0.97981789	0.98337389	0.98687855	0.98776982	0.98770854	0.99166673	0.99142413	0.98913607	0.98698983	0.9871734	0.97758001	0.9874567	0.99070384	0.98833651	0.99346311
Delta CoV 7	0.99445068	0.98932031	0.99206212	0.99445068	0.99368578	0.99167058	0.98202289	0.99326537	0.99414464	0.99414861	0.9958987	0.9909982	0.98911119	0.9887844	0.99376585	0.99044036	0.99223902	0.99491195	0.99512666	0.99382503	0.98972273	0.99266252	0.98855574	0.994904	0.99342661	0.99026861	0.99492857	0.99126817	0.99243567	0.99137243	0.98219041	0.99069671	0.98559152	0.98710485	0.98053744	0.99348711	0.98308812	0.98396211	0.98438024	0.98755421	0.98404801	0.9815687	0.98145268	0.98119816	0.9882214	0.98254356	0.98707619	0.9834944	0.5539028
[truncated: 11 more columns]
