# Supplementary material for: Compression-Complexity Measures for Analysis and Classification of Coronaviruses
Source: Entropy (Basel). 2022 Dec 31;25(1):81. doi: 10.3390/e25010081 (PMC9857615; doi:10.3390/e25010081)
Supplement: Supplementary file 1 [file entropy-25-00081-s001.zip › Covid19_LZC_DistanceMatrix.csv]

Distance Matrix of Covid-19 and non-Covid-19 viruses using LZC measure
	hCoV19 1	hCoV19 2	hCoV19 3	hCoV19 4	hCoV19 5	hCoV19 6	hCoV19 7	hCoV19 8	hCoV19 9	hCoV19 10	hCoV19 11	hCoV19 12	hCoV19 13	hCoV19 14	hCoV19 15	hCoV19 16	hCoV19 17	hCoV19 18	hCoV19 19	hCoV19 20	hCoV19 21	hCoV19 22	hCoV19 23	hCoV19 24	hCoV19 25	hCoV19 26	hCoV19 27	hCoV19 28	hCoV19 29	hCoV19 30	Alpha CoV 1	Alpha CoV 2	Alpha CoV 3	Alpha CoV 4	Alpha CoV 5	Alpha CoV 6	Alpha CoV 7	Beta CoV 1	Beta CoV 2	Beta CoV 3	Beta CoV 4	Beta CoV 5	Beta CoV 6	Beta CoV 7	Beta CoV 8	Beta CoV 9	Beta CoV 10	Gamma CoV 1	Gamma CoV 2
hCoV19 1
hCoV19 2	0.22939082
hCoV19 3	0.1982061	0.19139336
hCoV19 4	0.21600851	0.13549034	0.11296453
hCoV19 5	0.26072543	0.22791999	0.22274633	0.19716212
hCoV19 6	0.25288199	0.24169634	0.19323527	0.21534495	0.21249161
hCoV19 7	0.24693707	0.19240842	0.20030266	0.21826658	0.27137256	0.28980172
hCoV19 8	0.21359838	0.17646613	0.14961656	0.17608739	0.19480393	0.17830345	0.17650802
hCoV19 9	0.23915989	0.16732786	0.19248023	0.16264103	0.18127129	0.22112185	0.20674584	0.12114157
hCoV19 10	0.23469828	0.24960644	0.23142715	0.15374981	0.25928503	0.26443491	0.2105192	0.21213537	0.19865242
hCoV19 11	0.26104164	0.17182885	0.18837306	0.25825279	0.25522846	0.23874231	0.27190482	0.22979831	0.15987939	0.25522795
hCoV19 12	0.27164055	0.1868114	0.15561658	0.2081444	0.22677933	0.24060499	0.20006163	0.18836551	0.12716798	0.18775756	0.21846103
hCoV19 13	0.29203644	0.2635459	0.24970561	0.26749156	0.30359084	0.30866285	0.27239523	0.24345022	0.23861628	0.31658248	0.32989232	0.28409103
hCoV19 14	0.29755234	0.26474907	0.14689407	0.22096745	0.33514436	0.28396683	0.24282154	0.22296048	0.20507117	0.30478177	0.31805823	0.25059309	0.33178355
hCoV19 15	0.27811099	0.26260734	0.17943429	0.17555365	0.2549354	0.16041488	0.24565086	0.14275098	0.22907722	0.22894648	0.25095917	0.19651435	0.32088296	0.27875904
hCoV19 16	0.28365896	0.23786315	0.23269944	0.19837693	0.28660438	0.25707716	0.28122436	0.22205011	0.2215484	0.27786653	0.28248207	0.24538501	0.3438728	0.30611782	0.30389609
hCoV19 17	0.27485617	0.24641994	0.18477312	0.22435249	0.28199936	0.2915862	0.18975091	0.19580937	0.21716328	0.32114649	0.29107603	0.25836918	0.32639477	0.31879627	0.30388912	0.28318623
hCoV19 18	0.31708725	0.26260375	0.15770805	0.21887673	0.28094803	0.28608218	0.24103586	0.20779699	0.18128968	0.27662051	0.21613939	0.24416894	0.34255543	0.33943012	0.26798278	0.29955308	0.26466676
hCoV19 19	0.23144659	0.20730887	0.1414637	0.15487968	0.25166889	0.23081015	0.25527372	0.19152676	0.18670707	0.21698314	0.23462728	0.19318799	0.27429636	0.30149098	0.19532664	0.24427326	0.23104112	0.23432909
hCoV19 20	0.28249845	0.24101935	0.20120453	0.23629149	0.28973022	0.21258938	0.16267553	0.22525155	0.22907469	0.2853915	0.28569403	0.22690232	0.34260885	0.30061748	0.24205716	0.2173307	0.23871457	0.27672838	0.23878445
hCoV19 21	0.29831241	0.25683289	0.16936871	0.23910381	0.3444636	0.28899242	0.30909041	0.22807271	0.18420287	0.3098684	0.32316539	0.21671091	0.33680773	0.32077903	0.30550127	0.31985808	0.30229077	0.3098684	0.25893515	0.35319656
hCoV19 22	0.25408844	0.17359588	0.18576552	0.19923198	0.23528685	0.22310892	0.19531429	0.17513849	0.174674	0.20057167	0.17913875	0.2115092	0.27525541	0.24611353	0.20930284	0.2191687	0.17546575	0.20925244	0.2103377	0.22239999	0.29884231
hCoV19 23	0.27723073	0.19677767	0.13526647	0.20066114	0.2888462	0.24632029	0.27046042	0.1592823	0.17609387	0.26712964	0.24571934	0.22161222	0.28980774	0.26076792	0.27576392	0.24678117	0.22467045	0.2324503	0.19454014	0.24564972	0.35231713	0.22579812
hCoV19 24	0.22801171	0.23416235	0.17272281	0.18611404	0.23531412	0.22740284	0.20813307	0.22706568	0.165891	0.19623067	0.24418404	0.2633338	0.28386671	0.2721733	0.21355328	0.27556064	0.25359971	0.1702058	0.26655537	0.27000737	0.28150938	0.2199015	0.23885075
hCoV19 25	0.25763079	0.27245358	0.17631067	0.17673508	0.28215489	0.23965736	0.2292954	0.20470346	0.19555699	0.23882905	0.23044611	0.25838691	0.3220984	0.29734078	0.25186372	0.29211947	0.24856845	0.28651662	0.19654713	0.23462612	0.28942205	0.19315516	0.2293651	0.21913799
hCoV19 26	0.17049104	0.12468851	0.1325317	0.15905073	0.19501084	0.15685982	0.13341812	0.1522726	0.16486983	0.17769486	0.21274906	0.14528853	0.27399504	0.24915488	0.18211744	0.22662615	0.19183848	0.18203614	0.16576331	0.1561088	0.19360907	0.17975574	0.18549944	0.22292918	0.17894755
hCoV19 27	0.30408842	0.21492868	0.17072601	0.16678268	0.25061694	0.22110932	0.24975113	0.2034582	0.18128968	0.25493056	0.23351625	0.24850537	0.31658248	0.25275949	0.22460704	0.23880458	0.20811653	0.20283227	0.19095178	0.2853915	0.27955134	0.27430528	0.17603973	0.25689734	0.23449132	0.20373626
hCoV19 28	0.289489	0.21763947	0.20812451	0.21294443	0.23156249	0.25413145	0.22646678	0.22786835	0.22745662	0.26197127	0.2579507	0.27730043	0.31061935	0.30741137	0.20561016	0.271834	0.27613606	0.27499483	0.2283403	0.27073434	0.27353676	0.27704492	0.23505475	0.2378736	0.23718231	0.21084529	0.27933519
hCoV19 29	0.29356198	0.24343257	0.18631922	0.23000937	0.32245773	0.26264565	0.27379584	0.18434438	0.23577534	0.3007947	0.28375568	0.28123996	0.36663917	0.27282161	0.24445868	0.29350027	0.28449253	0.30945013	0.25420865	0.29660337	0.34700291	0.26812631	0.25681015	0.26816379	0.29333372	0.21051365	0.30512262	0.26877101
hCoV19 30	0.23480076	0.18900122	0.18817177	0.17992494	0.28102407	0.22119322	0.28913063	0.17751838	0.17272161	0.29839984	0.24665471	0.18786936	0.34263924	0.27017681	0.25074473	0.22151923	0.32127958	0.22030486	0.24309093	0.2117831	0.32293195	0.20501247	0.26720101	0.22664532	0.2996095	0.18649457	0.2159623	0.24037774	0.26622046
Alpha CoV 1	0.87649886	0.83872105	0.81660772	0.82204554	0.83760714	0.845004	0.84852606	0.79508186	0.83537409	0.86317804	0.88871708	0.80501097	0.8388895	0.93681555	0.84514847	0.8617464	0.8662024	0.89218507	0.84991305	0.816694	0.89867289	0.85527614	0.77508917	0.85481382	0.82179759	0.80678762	0.88389926	0.86184119	0.9228624	0.87537467
Alpha CoV 2	0.9411332	0.84102952	0.87710313	0.87415455	0.89384255	0.84318578	0.91693066	0.86373821	0.82514938	0.86947298	0.87423699	0.87368678	0.92419575	0.97249816	0.85981619	0.9511601	0.9222563	0.96514948	0.87299721	0.84374835	0.96340187	0.87833458	0.91011569	0.86966303	0.83635611	0.84641364	0.93189377	0.86387929	0.95865978	0.86092358	0.32535121
Alpha CoV 3	0.6660237	0.5792844	0.5739665	0.58492589	0.6254752	0.49786752	0.61594232	0.61697741	0.4968424	0.58245663	0.58816903	0.60183691	0.65415759	0.71995423	0.5757133	0.66206986	0.70776381	0.63214735	0.56621898	0.64446977	0.6599125	0.56797816	0.61462469	0.61898796	0.67005536	0.54782178	0.65922834	0.63273124	0.64915968	0.63318074	0.8482035	0.78698076
Alpha CoV 4	0.86884035	0.78532019	0.79647121	0.78935393	0.85056085	0.79991925	0.83211596	0.82470916	0.74028598	0.83456583	0.83936315	0.79720767	0.8767986	0.87931414	0.82911909	0.92455984	0.83738977	0.88454493	0.76728686	0.86704602	0.90355401	0.80597709	0.87098347	0.83052939	0.80143082	0.79494621	0.84706581	0.81235026	0.89046688	0.85103562	0.32223601	0.3057679	0.82024028
Alpha CoV 5	0.89408162	0.82300704	0.79664286	0.8229232	0.93400101	0.82921942	0.81972269	0.87912364	0.77380906	0.9056147	0.89794531	0.83494874	0.94363693	0.93356677	0.82513026	0.8788623	0.94199448	0.84719775	0.85078622	0.90055919	0.89960312	0.86452006	0.85442501	0.88896953	0.88913117	0.81187381	0.8764157	0.85842774	0.91977634	0.8553822	0.32227253	0.36297829	0.8167544	0.33964871
Alpha CoV 6	0.89114438	0.81595206	0.839596	0.81580341	0.83541803	0.88881783	0.81242694	0.81785084	0.90004217	0.89436085	0.81575176	0.86948524	0.8658218	0.90581436	0.87224039	0.91774792	0.92641302	0.91101719	0.85624764	0.91017697	0.82182743	0.82410497	0.91412313	0.84870794	0.84456605	0.77970608	0.87353175	0.85130489	0.91282401	0.87333088	0.38177084	0.45148288	0.84121689	0.38707991	0.29236791
Alpha CoV 7	0.6993879	0.65752015	0.61104096	0.61408609	0.61579838	0.69271725	0.67641039	0.61830946	0.67130172	0.7377632	0.66679387	0.66288665	0.72253775	0.70586744	0.61789025	0.70761683	0.71117232	0.75594976	0.63008295	0.65810814	0.65966208	0.6506164	0.74090617	0.67738887	0.68948796	0.61809893	0.62393066	0.6532022	0.70711822	0.70282275	0.76233133	0.76151211	0.54907922	0.70868829	0.77731214	0.75127549
Beta CoV 1	0.86588999	0.82817506	0.76844911	0.78221157	0.86415492	0.83436906	0.81251946	0.88842865	0.73726478	0.83152758	0.84471057	0.88181852	0.83626078	0.9095288	0.82615729	0.88821223	0.80093542	0.86908091	0.78504456	0.77226895	0.89223137	0.80712422	0.84706869	0.87325841	0.80671203	0.77533966	0.89409907	0.82606222	0.87075443	0.87308848	0.31036725	0.388076	0.81508704	0.32781822	0.24528972	0.28467637	0.73181937
Beta CoV 2	0.86264896	0.78316956	0.79435304	0.77062022	0.81902767	0.83937998	0.82216058	0.77254113	0.82178777	0.84910609	0.89995207	0.8160826	0.85374843	0.93529682	0.81874298	0.86814168	0.91073504	0.83239187	0.79003209	0.86067689	0.83045564	0.8205365	0.86448357	0.85321477	0.81173272	0.7470619	0.85328367	0.82703625	0.88814932	0.88656714	0.24412303	0.40383111	0.84673915	0.31903027	0.35200198	0.2963489	0.78850909	0.33611893
Beta CoV 3	0.63353258	0.65173668	0.65068649	0.66432927	0.62769461	0.67069848	0.66258353	0.62779497	0.65706776	0.68356348	0.69258126	0.6594149	0.73130387	0.74148438	0.65748862	0.77921519	0.66400019	0.70920204	0.65832619	0.69179824	0.67341336	0.67649614	0.73803394	0.67191015	0.67584636	0.61069366	0.67928897	0.65215718	0.66009431	0.65364073	0.72114814	0.71508738	0.7098262	0.6715116	0.75454482	0.71886107	0.742579	0.72215994	0.69747626
Beta CoV 4	0.83016942	0.81332424	0.79546	0.758709	0.82523381	0.82834387	0.83697941	0.8151521	0.8219062	0.84179898	0.86291067	0.8414131	0.89683603	0.8998836	0.79031779	0.89055815	0.84786639	0.85426508	0.83716076	0.87056705	0.8449109	0.82979523	0.92045154	0.88829677	0.83373233	0.79736544	0.87918692	0.89799949	0.8239551	0.86219138	0.70393925	0.68118058	0.75697667	0.62457846	0.74222447	0.72068958	0.90419812	0.6935717	0.65551088	0.72322551
Beta CoV 5	0.80407363	0.8000623	0.7440007	0.74558179	0.82272301	0.79742951	0.76418574	0.80198811	0.7299056	0.85343688	0.8543276	0.77027781	0.85781953	0.83850324	0.8064196	0.80887955	0.82317681	0.76495646	0.840322	0.77648595	0.84261688	0.82492057	0.81786925	0.8110287	0.81167346	0.77264321	0.81132502	0.80633637	0.79118608	0.79030459	0.66266436	0.67941866	0.72020756	0.66527894	0.73224826	0.68774307	0.67093477	0.71230773	0.73413996	0.73720854	0.79139555
Beta CoV 6	0.70827066	0.63000155	0.62447619	0.62297212	0.69749027	0.67887484	0.62580654	0.57251684	0.60733667	0.67838514	0.67112464	0.57609368	0.66774228	0.70110757	0.62677855	0.71650406	0.68812663	0.71480244	0.62531124	0.63968883	0.69129448	0.67315602	0.60422494	0.62716377	0.63464458	0.60420648	0.67838514	0.68488336	0.62960681	0.69805133	0.75794283	0.7703199	0.57728553	0.71307755	0.71530061	0.7158817	0.08531971	0.73177727	0.73531821	0.7107553	0.86912953	0.70658405
Beta CoV 7	0.71669795	0.64753699	0.67388118	0.67690268	0.73783561	0.66917754	0.61553619	0.63560299	0.64759809	0.70957378	0.67949026	0.657393	0.69441864	0.75966365	0.61691185	0.73406868	0.70096747	0.74144398	0.68838664	0.70733118	0.72709186	0.71344887	0.6946754	0.6720728	0.68405963	0.59888115	0.71412805	0.7069027	0.66998514	0.71556973	0.76811587	0.84211512	0.67808906	0.74068168	0.79594547	0.73906797	0.1964175	0.77256746	0.87338583	0.7964493	0.82252776	0.7111369	0.22502576
Beta CoV 8	0.7805562	0.6863955	0.65043166	0.6429177	0.76455112	0.67426953	0.698528	0.67490018	0.66219503	0.76571095	0.73146607	0.72092545	0.73964291	0.75289135	0.71391442	0.76154961	0.72435131	0.72191522	0.6879046	0.73436963	0.79372485	0.68927738	0.70211283	0.78393864	0.72319745	0.6718683	0.77008819	0.73887582	0.71833343	0.70045847	0.69809504	0.87107656	0.64658997	0.77760898	0.79480754	0.83340457	0.68647385	0.80506365	0.86721933	0.68659099	0.79181879	0.76522654	0.71864738	0.76748867
Beta CoV 9	0.68936848	0.67482867	0.69658051	0.65413717	0.69230535	0.70096675	0.71641552	0.69932965	0.68403241	0.70045672	0.70229686	0.67561686	0.76260054	0.78232397	0.62605028	0.74769527	0.68276684	0.73232371	0.68380653	0.77998916	0.7088472	0.68612462	0.74918108	0.68110827	0.73409101	0.60802607	0.71411676	0.7114857	0.69266772	0.72921971	0.77165446	0.90740661	0.62701389	0.75319844	0.77755777	0.76044182	0.15970192	0.72319493	0.766534	0.80978026	0.86546652	0.69741156	0.17850492	0.26009678	0.77280303
Beta CoV 10	0.74493258	0.63934452	0.71568956	0.64142713	0.68864105	0.77455335	0.67632713	0.63653369	0.67134453	0.69683395	0.75334936	0.66291191	0.69528594	0.76502441	0.69988864	0.73949981	0.7339653	0.7560119	0.68927444	0.6945353	0.72338083	0.75529388	0.70459732	0.70926044	0.67586119	0.64999998	0.66037812	0.75345979	0.76169728	0.70740229	0.80277832	0.762277	0.60086646	0.71385341	0.72047386	0.72548429	0.13865998	0.70153946	0.76711476	0.77441009	0.83916367	0.66250903	0.13781789	0.20470365	0.70930653	0.29064632
Gamma CoV 1	0.73035483	0.65664351	0.7738471	0.66323907	0.7832722	0.66007642	0.6842476	0.64015938	0.64304185	0.74599503	0.74784083	0.6665045	0.74901559	0.76875747	0.6625036	0.73862193	0.76940202	0.76874337	0.69748719	0.7391636	0.71799521	0.73164677	0.71742291	0.75841743	0.69316614	0.63990741	0.69135212	0.72513411	0.71547197	0.70190577	0.78130102	0.88178899	0.62042508	0.76719447	0.80037045	0.79653873	0.20132509	0.79026329	0.81587662	0.73314425	0.87088183	0.72902925	0.1513874	0.28699206	0.73028314	0.25519264	0.29301298
Gamma CoV 2	0.69895099	0.67510759	0.66980522	0.66242958	0.6600006	0.63571765	0.62526051	0.65451685	0.59774448	0.68365158	0.73789294	0.58585906	0.66584858	0.7627896	0.60505539	0.78074587	0.66400292	0.74138131	0.64066313	0.66953087	0.69397966	0.64216407	0.73397992	0.74206022	0.67189152	0.61214014	0.68809495	0.73682282	0.69269512	0.72431896	0.75433249	0.73833091	0.74888278	0.70061987	0.71799109	0.79536978	0.80330078	0.6942819	0.70638193	0.59853745	0.70430416	0.81419431	0.81222809	0.87479874	0.70773095	0.82413062	0.74135679	0.83243932
Gamma CoV 3	0.65543414	0.7058623	0.65660577	0.68470146	0.71772872	0.64507282	0.67176622	0.73827702	0.60749358	0.70630636	0.71614248	0.6794006	0.73679883	0.75401691	0.72048502	0.75874631	0.66556975	0.66238999	0.68084909	0.73583658	0.70314486	0.67806755	0.74269644	0.69330156	0.66364427	0.58209654	0.71069565	0.74580859	0.70615391	0.66739844	0.68324646	0.75026762	0.73349202	0.68277523	0.67494574	0.7427768	0.69757085	0.66830313	0.68032055	0.71661489	0.80241957	0.63728206	0.57578804	0.68969563	0.63294413	0.77446555	0.64118104	0.72234427	0.75268882
Gamma CoV 4	0.91920931	0.83490641	0.84638824	0.835183	0.87004012	0.85760118	0.84051241	0.81977198	0.84921781	0.80743909	0.87205909	0.81753678	0.87993328	0.88981748	0.82833285	1	0.92545268	0.98579235	0.8625941	0.93803475	0.96636282	0.91067794	0.91171184	0.81602582	0.85902616	0.79038874	0.87971487	0.90447166	0.9780681	0.86709881	0.39624219	0.36014733	0.90508282	0.22473291	0.41728044	0.41856037	0.71100397	0.31790441	0.38167974	0.7038782	0.6934312	0.74338395	0.75595989	0.83673141	0.81411052	0.80956855	0.75195303	0.78711855	0.78294744
Gamma CoV 5	0.78782974	0.69710472	0.69630934	0.73356064	0.81096945	0.76450845	0.70939236	0.66735504	0.63722232	0.71868839	0.77778478	0.66989791	0.74096924	0.78909628	0.67564344	0.74015131	0.75706697	0.70078511	0.7069436	0.7313397	0.82278415	0.71294382	0.74245346	0.74641883	0.72935798	0.68309697	0.74552999	0.73204014	0.75002424	0.76419559	0.79416591	0.84639302	0.71834056	0.71328651	0.76975379	0.80407713	0.7669067	0.82438861	0.74111348	0.6777721	0.83621046	0.71399913	0.84705764	0.82423168	0.60513793	0.74477866	0.74222775	0.8099825	0.68536578
Gamma CoV 6	0.66839853	0.61349368	0.6702212	0.71162641	0.6472677	0.70267198	0.69730005	0.71259271	0.67813371	0.68419112	0.68956011	0.60868614	0.71072302	0.75438426	0.61900122	0.72358169	0.66910585	0.76394352	0.65450662	0.69663652	0.68562901	0.66045379	0.64140193	0.70703141	0.68126986	0.62153851	0.68419112	0.75055385	0.73302447	0.69816732	0.7659145	0.77617044	0.68529664	0.75569922	0.72145923	0.74269125	0.69136285	0.76675112	0.75729872	0.59906362	0.72095964	0.76967704	0.70029489	0.8146535	0.66354908	0.80161561	0.7330749	0.7817369	0.38591897
Delta CoV 1	0.70125318	0.61962673	0.63657217	0.68701416	0.71992685	0.66903493	0.60081298	0.69681639	0.64899513	0.65030012	0.70911305	0.69490549	0.72582002	0.76500605	0.68294946	0.76971062	0.63059742	0.74371449	0.66067543	0.65839136	0.73615517	0.74220567	0.75396025	0.6822155	0.71416028	0.64116628	0.77925006	0.71697614	0.7348072	0.67328252	0.70067731	0.76198802	0.75368361	0.74166239	0.78513752	0.69384387	0.73452136	0.74413587	0.7304621	0.59605093	0.70126234	0.75621627	0.80950755	0.74938012	0.71087355	0.84492893	0.74795926	0.76827426	0.40090305
Delta CoV 2	0.70030789	0.50777122	0.61788162	0.53064173	0.67899689	0.61041037	0.60060193	0.56713699	0.56374076	0.59181979	0.58831989	0.58741306	0.61837851	0.63095682	0.53992981	0.6400609	0.63458376	0.60070683	0.59765479	0.60872311	0.66418685	0.57255219	0.56219703	0.59698422	0.6111356	0.52925048	0.61403411	0.60949434	0.63181723	0.61029983	0.70470347	0.76645432	0.6126097	0.67288586	0.63425682	0.69427834	0.67706658	0.64082131	0.73951474	0.56399173	0.65006551	0.75718452	0.68599474	0.76267586	0.60314632	0.74967406	0.71880699	0.76738242	0.34421226
Delta CoV 3	0.61491995	0.61278505	0.64690349	0.56955642	0.69919803	0.6484843	0.61365775	0.59691112	0.5185862	0.64825626	0.64931109	0.56422173	0.60848115	0.63004625	0.61857449	0.61274564	0.62946031	0.61306284	0.56565422	0.67785538	0.66703497	0.5848443	0.6187981	0.63526745	0.66270183	0.59000613	0.58224608	0.61744025	0.68319029	0.58728751	0.66462823	0.68890236	0.6198924	0.63849495	0.70772628	0.73696243	0.61227391	0.67541629	0.67044784	0.69797857	0.77897844	0.53264259	0.58378523	0.68366929	0.5790822	0.6799269	0.59311369	0.57614893	0.68988
Delta CoV 4	0.63415775	0.68913401	0.66616999	0.61957455	0.731663	0.61505774	0.66365312	0.598558	0.63022388	0.71585477	0.64212532	0.5834387	0.64534723	0.65814364	0.66418945	0.67162035	0.67507913	0.65870552	0.62010285	0.69275681	0.65557925	0.65686316	0.69960216	0.66774576	0.68196078	0.63999786	0.61909821	0.65425416	0.68935095	0.6681298	0.63360245	0.74732837	0.68796182	0.65843896	0.68907501	0.71419855	0.64734561	0.69957371	0.66880678	0.64748987	0.79505595	0.5260463	0.67025964	0.75608851	0.57504297	0.66830796	0.64689545	0.71409045	0.79869418
Delta CoV 5	0.74844925	0.733668	0.68818928	0.70313398	0.73138666	0.68491625	0.62954822	0.5652145	0.60677578	0.70611948	0.73839946	0.67972879	0.70601091	0.77645514	0.67651945	0.72755335	0.72664873	0.64343369	0.64963073	0.6561309	0.68958188	0.71825449	0.77446552	0.63101885	0.69889222	0.59446052	0.73295817	0.70608496	0.6927047	0.74269208	0.69856634	0.833006	0.6750314	0.67821266	0.73472654	0.76901501	0.70995177	0.76330374	0.72795455	0.68724365	0.77487017	0.71883051	0.72366112	0.7625105	0.58427581	0.73534067	0.72330151	0.78627291	0.64175475
Delta CoV 6	0.73693454	0.7221389	0.63197526	0.63348985	0.73769349	0.69124424	0.69014192	0.59852985	0.60873358	0.64537759	0.68215327	0.6279635	0.70788659	0.7648935	0.62921642	0.68918376	0.66587597	0.64537759	0.66494659	0.67143164	0.67357092	0.67544636	0.68698716	0.64629867	0.66501528	0.58746774	0.66328743	0.67669821	0.66326907	0.70435626	0.63873021	0.73838325	0.63215516	0.64434181	0.69652127	0.73950034	0.67685299	0.72947417	0.64615433	0.59987258	0.76681279	0.68072758	0.72858971	0.70561795	0.52758921	0.71174429	0.68544208	0.7246439	0.640579
Delta CoV 7	0.67616296	0.64340761	0.66907802	0.59527238	0.61512815	0.58638416	0.58490841	0.63616942	0.58392035	0.66091902	0.61302108	0.59873033	0.64314093	0.77092163	0.60904532	0.72689199	0.64139206	0.58102833	0.58689483	0.60689362	0.67564208	0.60613891	0.65801454	0.63507246	0.64913321	0.59383347	0.64761372	0.64300176	0.64778681	0.67046175	0.73403529	0.70120713	0.62013717	0.73238982	0.67224591	0.76244272	0.65877471	0.70895255	0.71672769	0.62434936	0.71480927	0.75943657	0.7335929	0.79617899	0.64484447	0.73611834	0.72873394	0.74915545	0.39505551
[truncated: 11 more columns]
