# Supplementary material for: Compression-Complexity Measures for Analysis and Classification of Coronaviruses
Source: Entropy (Basel). 2022 Dec 31;25(1):81. doi: 10.3390/e25010081 (PMC9857615; doi:10.3390/e25010081)
Supplement: Supplementary file 1 [file entropy-25-00081-s001.zip › Mammals_ETC_DistanceMatrix.csv]

		Distance Matrix of Mammals using ETC measure
	Indian Rhinoceros	White Rhinoceros	Donkey	Horse	Bornean Orangutan	Sumatran Orangutan	Lar Gibbon	Gorilla	Grivet monkey	Barbary Macaque	Human	Baboon	Common Chimpanzee	Pigmy Chimpanzee	Buffalo	Cow	Goat	Sheep	Tibetan Antelope	Taiwan serow	Wild Boar	Common Warthog	Hedge Hog	Edible dormouse	Red Squirrel	Dog	Himalayan Wolf	Giant Panda	Brown Bear	Polar Bear	Asian Black Bear	Cat	Leopard	Tiger	Bowhead Whale	Gray Whale	North Pacific Right Whale	Indus river Dolphin	Blue Whale	Fin Whale	European Rabbit
Indian Rhinoceros
White Rhinoceros	0.4230414
Donkey	0.13970986	0.42607164
Horse	0.40718731	0.29059463	0.40457932
Bornean Orangutan	0.43620591	0.32400456	0.43858291	0.29381523
Sumatran Orangutan	0.73025104	0.73814987	0.73637719	0.73949601	0.75693729
Lar Gibbon	0.92671257	0.9285751	0.92098537	0.92622695	0.92757358	0.92373485
Gorilla	0.92845615	0.93307912	0.92981794	0.925998	0.93760215	0.9295771	0.55313202
Grivet monkey	0.9264829	0.92634265	0.93091158	0.93149059	0.92405326	0.92282698	0.66723678	0.70293637
Barbary Macaque	0.92112515	0.913624	0.91887543	0.91570462	0.92115391	0.91780266	0.68014125	0.70618426	0.40301137
Human	0.92319551	0.92390772	0.91862652	0.92777693	0.93170117	0.91772713	0.68560272	0.71074013	0.50509781	0.50990997
Baboon	0.93099634	0.93956198	0.93315667	0.94434474	0.9284034	0.9325482	0.675679	0.7072438	0.46940057	0.48953572	0.51575641
Common Chimpanzee	0.93574506	0.93876317	0.93915967	0.9471828	0.9440236	0.95244118	0.93875414	0.93823853	0.93525915	0.93042838	0.93478444	0.94709374
Pigmy Chimpanzee	0.9373192	0.93872286	0.94802779	0.94461007	0.94540622	0.95301513	0.93646848	0.94173511	0.93603017	0.92943396	0.9255346	0.94262013	0.38606502
Buffalo	0.94512891	0.93901551	0.9397487	0.94237016	0.9529341	0.94748043	0.94238554	0.93851363	0.93477274	0.93040243	0.93763922	0.93897018	0.94317532	0.94014482
Cow	0.94957175	0.9448883	0.94260663	0.947447	0.94918351	0.95487479	0.94683738	0.95301078	0.93444562	0.94157705	0.94924487	0.95374834	0.94812272	0.95235535	0.53440497
Goat	0.94751461	0.94254173	0.94944914	0.9395153	0.94414131	0.95209038	0.94287346	0.94444423	0.93920152	0.93710335	0.93313022	0.93668392	0.94831945	0.94592925	0.84322597	0.8105803
Sheep	0.94346741	0.93332919	0.94014842	0.93039168	0.93187017	0.94809025	0.94054429	0.9493	0.93689702	0.93670904	0.93545207	0.94317179	0.95236115	0.93873	0.83215024	0.80432947	0.25736727
Tibetan Antelope	0.97024902	0.96133533	0.96875003	0.970908	0.96814229	0.95615195	0.94876	0.95222551	0.9579049	0.948965	0.94796995	0.96412536	0.9540121	0.96481064	0.9349007	0.94228844	0.94690761	0.95080611
Taiwan serow	0.96682895	0.96175317	0.96593959	0.96611577	0.9688535	0.95299283	0.95878415	0.957695	0.95956628	0.94533254	0.95140528	0.94975204	0.95227096	0.95505009	0.93731012	0.94467699	0.94373414	0.9455874	0.0938775
Wild Boar	0.95976264	0.95185552	0.96458432	0.95439076	0.95997215	0.96033102	0.94831515	0.94289652	0.94244617	0.93413766	0.944052	0.94696517	0.94872133	0.95229605	0.9397729	0.94696304	0.92794882	0.93061745	0.89815	0.89328399
Common Warthog	0.96630104	0.95438366	0.96309816	0.96342448	0.96093646	0.95816598	0.95152439	0.95262518	0.94760448	0.94358449	0.94839596	0.95243901	0.96362047	0.96925074	0.94191543	0.94391131	0.92730006	0.93128017	0.8966589	0.89740933	0.5976274
Hedge Hog	0.96511666	0.95506689	0.96253049	0.96162551	0.96375541	0.95884618	0.95018006	0.95410678	0.94703577	0.93923554	0.94515712	0.9487298	0.96057835	0.96469913	0.94054346	0.94522786	0.92771466	0.93361911	0.89697089	0.89568361	0.5834464	0.08094545
Edible dormouse	0.96396307	0.95531903	0.96430212	0.95893238	0.96246371	0.9557106	0.95026482	0.9510461	0.9472291	0.93882145	0.94332677	0.94986717	0.95579613	0.96392621	0.9416101	0.93624467	0.9282171	0.92602722	0.89476403	0.89312931	0.59552518	0.15291835	0.15431572
Red Squirrel	0.95440971	0.95068484	0.94927732	0.95073086	0.95647781	0.96036397	0.95719777	0.95392825	0.95786988	0.94987655	0.96101685	0.95992432	0.94796118	0.95231824	0.92219498	0.92481168	0.92169893	0.91817066	0.90658075	0.90312174	0.90674376	0.90571517	0.90365213	0.90906602
Dog	0.94979213	0.94951726	0.94667465	0.95549402	0.95220834	0.9658366	0.95837098	0.95385028	0.95067196	0.94338632	0.95289416	0.95441331	0.94740052	0.94723046	0.93737828	0.93310316	0.92336591	0.93187822	0.92131114	0.91740954	0.89718506	0.89815567	0.89827793	0.89466507	0.46454485
Himalayan Wolf	0.94987794	0.94959851	0.95038177	0.95229839	0.94680771	0.95728306	0.95906222	0.95377585	0.9560109	0.94503886	0.9532799	0.95370874	0.95169897	0.94981252	0.93348909	0.92529126	0.92883783	0.92666459	0.9212832	0.91853363	0.89669149	0.89613819	0.89659973	0.89501817	0.47347275	0.2500192
Giant Panda	0.96426253	0.96786111	0.97388714	0.967046	0.96364819	0.96806273	0.9720552	0.96674623	0.96917667	0.957743	0.96176241	0.96578733	0.96105111	0.96776386	0.9627664	0.97107094	0.95915882	0.9625744	0.96636982	0.96206432	0.96227586	0.96237864	0.96389641	0.96066318	0.96411274	0.9617295	0.94850174
Brown Bear	0.97717976	0.9686912	0.97480029	0.97991568	0.97253132	0.97262323	0.98066576	0.98280311	0.97964442	0.97237713	0.98105545	0.98979432	0.97577283	0.97975507	0.96499428	0.97603981	0.96346359	0.96360775	0.97610022	0.97738455	0.97769663	0.97628907	0.97179862	0.97709448	0.96872713	0.97844018	0.97994494	0.97727025
Polar Bear	0.97361225	0.96950148	0.97090432	0.98015825	0.97456398	0.97571777	0.97256182	0.97715041	0.96813089	0.95672125	0.97604155	0.97886274	0.97039552	0.98402724	0.97050834	0.97093051	0.96409382	0.95664375	0.97390093	0.96822246	0.96350583	0.968025	0.96561699	0.9630723	0.95851416	0.96183688	0.96541177	0.96187599	0.96821387
Asian Black Bear	0.98524444	0.97663811	0.98572739	0.98856222	0.98884121	0.97573267	0.97085375	0.97668324	0.97493525	0.97047671	0.97694522	0.97763939	0.98811217	0.98253585	0.97953459	0.98657618	0.97321199	0.97700564	0.98947278	0.98998676	0.98345085	0.9809585	0.97932802	0.9806006	0.97657064	0.97335412	0.97081753	0.9665006	0.97471825	0.98322219
Cat	0.99530343	0.98291322	0.99223317	0.98074272	0.98447184	0.98126813	0.98283966	0.97544719	0.98064096	0.9728893	0.98413903	0.98306441	0.98528392	0.98582139	0.98584465	0.9831787	0.97292552	0.97338609	0.98903462	0.98554612	0.98212791	0.98757681	0.98237861	0.9824212	0.98469441	0.97928679	0.97946125	0.97360575	0.9775612	0.97974728	0.26687109
Leopard	0.98832939	0.97869251	0.98761523	0.98042128	0.97708686	0.98155147	0.97387002	0.97709345	0.98345946	0.96922384	0.97720634	0.97776298	0.97746987	0.97847094	0.98089326	0.9828503	0.97532033	0.97593489	0.98886928	0.98820123	0.98850415	0.98308922	0.97965944	0.97880693	0.97614704	0.97985813	0.97688433	0.97582987	0.97573452	0.97093875	0.78356133	0.77666099
Tiger	0.98171114	0.98274077	0.98174581	0.98461481	0.98744289	0.97396697	0.97167037	0.97933341	0.97303691	0.97069425	0.97428014	0.97252317	0.99266043	0.98696127	0.97675231	0.98156632	0.97707695	0.98507406	0.98525241	0.98592919	0.98234867	0.97698583	0.98570951	0.9830909	0.98564989	0.97962984	0.97725381	0.96718902	0.97916582	0.97530393	0.68654316	0.67560229	0.76497369
Bowhead Whale	0.98420936	0.97725361	0.98228745	0.98184491	0.98288399	0.96963754	0.97545073	0.98079589	0.97856901	0.96575668	0.9730075	0.97719602	0.98171657	0.98390262	0.9701533	0.98059318	0.98228473	0.98079774	0.98052915	0.98016327	0.98077721	0.98098254	0.9813008	0.98167055	0.97869761	0.97564183	0.9747721	0.97834562	0.97654231	0.98563246	0.86527021	0.8831412	0.86654379	0.86452402
Gray Whale	0.97958811	0.9813471	0.99291498	0.98487681	0.9891689	0.9822363	0.98742718	0.98777063	0.98937442	0.98199527	0.98766717	0.99138179	0.98645933	0.97592523	0.98063439	0.98320838	0.9876145	0.99578829	0.99110715	0.98391093	0.9891211	0.98510597	0.99028149	0.98570731	0.98056548	0.98603116	0.98366951	0.98284067	0.98230249	0.99382286	0.88364475	0.89726599	0.87437861	0.8836706	0.60730205
North Pacific Right Whale	0.97820123	0.97816755	0.97899031	0.98411057	0.98138905	0.9766374	0.98049238	0.98655323	0.97758792	0.97508274	0.98287633	0.9815068	0.98406083	0.98579893	0.98196396	0.98498729	0.98626362	0.98585761	0.98664515	0.98583305	0.98405954	0.98090771	0.98300567	0.98643678	0.98561339	0.98512728	0.98052434	0.98028725	0.97899625	0.97726391	0.70396022	0.70228765	0.75778249	0.4377293	0.87002117	0.87468025
Indus river Dolphin	0.98284097	0.97979429	0.98272294	0.98317378	0.98881617	0.98294334	0.97879644	0.99336529	0.98588839	0.97382958	0.98312508	0.98310056	0.98338476	0.98719643	0.98559154	0.98681425	0.98796369	0.987412	0.98431692	0.97855871	0.98723019	0.98733173	0.9864424	0.97857896	0.97893067	0.98811505	0.98055601	0.98117185	0.98579513	0.98158102	0.88623019	0.88516839	0.86258567	0.87679295	0.61216909	0.58419363	0.87586171
Blue Whale	0.98421188	0.97980243	0.97577676	0.98514036	0.98377035	0.97676203	0.9771285	0.99072438	0.97726532	0.98166552	0.98150603	0.97997539	0.97894262	0.98890658	0.98074648	0.9882593	0.97951003	0.98464544	0.9872278	0.98656471	0.97879751	0.98433368	0.97849639	0.97940925	0.98322237	0.97973483	0.98170536	0.97772142	0.97987705	0.97587686	0.70424345	0.67988076	0.74466064	0.42446499	0.86879495	0.879821	0.2880307	0.87288759
Fin Whale	0.97360289	0.97917142	0.97165531	0.98045243	0.97968264	0.97523929	0.97254945	0.98738891	0.97360258	0.96547473	0.97195118	0.97479145	0.98068583	0.98078342	0.98246231	0.98592461	0.9797529	0.97600832	0.98654573	0.98245448	0.97178709	0.98243506	0.97870416	0.97376923	0.9813298	0.97559183	0.97622287	0.9779069	0.97652922	0.97099694	0.69996061	0.69152366	0.74427136	0.43817003	0.86827541	0.86616972	0.29539889	0.86773001	0.15371998
European Rabbit	0.99113062	0.98539307	0.98852234	0.98671716	0.99146508	0.9845985	0.98296514	0.9911184	0.99136984	0.97774807	0.98338211	0.98848486	0.98030966	0.98278833	0.9840086	0.98608725	0.99713753	1	0.99069995	0.98961504	0.97851659	0.98157121	0.98239844	0.98440825	0.98110991	0.97899187	0.98221445	0.99907078	0.98944252	0.98008957	0.98755136	0.99112042	0.9858518	0.99119648	0.98905307	0.99019607	0.99324785	0.99132109	0.99484888	0.98754806
