# Supplementary material for: Compression-Complexity Measures for Analysis and Classification of Coronaviruses
Source: Entropy (Basel). 2022 Dec 31;25(1):81. doi: 10.3390/e25010081 (PMC9857615; doi:10.3390/e25010081)
Supplement: Supplementary file 1 [file entropy-25-00081-s001.zip › Mammals_LZC_DistanceMatrix.csv]

	Distance matrix of Mammals using LZC Measure
	Indian Rhinoceros	White Rhinoceros	Donkey	Horse	Bornean Orangutan	Sumatran Orangutan	Lar Gibbon	Gorilla	Grivet monkey	Barbary Macaque	Human	Baboon	Common Chimpanzee	Pigmy Chimpanzee	Buffalo	Cow	Goat	Sheep	Tibetan Antelope	Taiwan serow	Wild Boar	Common Warthog	Hedge Hog	Edible dormouse	Red Squirrel	Dog	Himalayan Wolf	Giant Panda	Brown Bear	Polar Bear	Asian Black Bear	Cat	Leopard	Tiger	Bowhead Whale	Gray Whale	North Pacific Right Whale	Indus river Dolphin	Blue Whale	Fin Whale	European Rabbit
Indian Rhinoceros
White Rhinoceros	0.049784962
Donkey	0.047965297	0.047726602
Horse	0.051829211	0.048099723	0.04977177
Bornean Orangutan	0.049820423	0.048250861	0.049424977	0.049132742
Sumatran Orangutan	0.053040118	0.053631807	0.051480432	0.053516747	0.05350144
Lar Gibbon	0.05697726	0.052928738	0.053439267	0.054471388	0.054619972	0.056688075
Gorilla	0.053632394	0.053224361	0.055224939	0.055927663	0.053095296	0.058309175	0.056610641
Grivet monkey	0.053969789	0.052072819	0.050754222	0.053281233	0.054401813	0.056822034	0.053278496	0.055072796
Barbary Macaque	0.057060242	0.054010562	0.055325309	0.055384167	0.05683317	0.058100587	0.05537811	0.055195824	0.053100587
Human	0.05485883	0.052298012	0.052136489	0.051192138	0.054641813	0.058041024	0.055662016	0.054809751	0.052856977	0.050349472
Baboon	0.056082618	0.053690746	0.054025163	0.052920887	0.054380597	0.054807783	0.054412607	0.055873626	0.05077794	0.050909787	0.05165952
Common Chimpanzee	0.05355951	0.054791017	0.053961755	0.051881008	0.053991553	0.056574186	0.055327897	0.055149947	0.054056236	0.055028774	0.055754315	0.054493519
Pigmy Chimpanzee	0.05520274	0.051662162	0.051820605	0.05188304	0.052836874	0.053443134	0.054008489	0.053997291	0.052892232	0.054684713	0.05278972	0.052677994	0.047613638
Buffalo	0.054575601	0.052186262	0.05167894	0.055035154	0.051875731	0.057425595	0.053695202	0.054676744	0.056054426	0.055083096	0.056119014	0.05583294	0.054261379	0.053745169
Cow	0.053615859	0.05368922	0.052855909	0.05292681	0.054690906	0.056301597	0.054706195	0.054375439	0.056229819	0.056566312	0.055974615	0.054707995	0.052804249	0.053756761	0.052560409
Goat	0.055587914	0.054841668	0.050395756	0.053255063	0.056179118	0.057289153	0.056205329	0.056359427	0.055714225	0.057342813	0.055956422	0.055677514	0.056827356	0.055496154	0.05540422	0.057205302
Sheep	0.054477172	0.054717161	0.053400726	0.054117343	0.054906961	0.057822954	0.056246721	0.055578496	0.053135002	0.05639556	0.054352921	0.055550448	0.05506145	0.053242404	0.054290218	0.055118017	0.050667141
Tibetan Antelope	0.0555846	0.055490046	0.054997757	0.053094489	0.055024719	0.058603132	0.059461533	0.056031685	0.05681315	0.058283198	0.056266464	0.056306147	0.05336932	0.049264719	0.057947178	0.056335828	0.058422045	0.056994781
Taiwan serow	0.054874269	0.053961767	0.054938976	0.054838655	0.055128767	0.055766051	0.053199295	0.054831485	0.054632755	0.055290156	0.056855417	0.056402072	0.053307622	0.05034696	0.055768094	0.054804393	0.055107122	0.055463175	0.045471028
Wild Boar	0.060388061	0.058497557	0.058654021	0.058397109	0.058030886	0.062105776	0.05675491	0.062460538	0.056411974	0.061936039	0.059604168	0.058497167	0.060128982	0.056198398	0.059507886	0.059510294	0.063833797	0.05950877	0.05762987	0.055933915
Common Warthog	0.057086728	0.056981418	0.054856509	0.054935879	0.05683393	0.058967532	0.057177453	0.058009738	0.056382227	0.059645283	0.060370458	0.05715574	0.057536596	0.057800548	0.060476334	0.057098753	0.058479548	0.057698674	0.056775713	0.056521759	0.053664019
Hedge Hog	0.05987783	0.056533583	0.055222324	0.055625315	0.056872883	0.05965738	0.058998571	0.058212841	0.056730808	0.060152726	0.058625313	0.054925029	0.057075856	0.05379473	0.057279525	0.056471532	0.058020078	0.057079223	0.05647671	0.055741137	0.052398508	0.045166262
Edible dormouse	0.055083652	0.05465632	0.051563622	0.05536916	0.054679475	0.058103788	0.053574668	0.056834319	0.05303448	0.057418747	0.057693556	0.055614357	0.053990236	0.052326784	0.0536822	0.054814183	0.055123138	0.055314967	0.055042439	0.052059087	0.054636192	0.051208226	0.05010675
Red Squirrel	0.055640337	0.053262329	0.052596383	0.053487526	0.053278068	0.059145159	0.055733925	0.055751084	0.05639282	0.058687817	0.055367169	0.055551463	0.053503533	0.052000352	0.051785504	0.056621936	0.054297106	0.054483577	0.052281415	0.052679471	0.056241496	0.055262996	0.056706199	0.053618593
Dog	0.056573991	0.057282157	0.054507917	0.056534387	0.054863231	0.058453023	0.055859183	0.057987676	0.056834627	0.056703753	0.056782293	0.054861208	0.057657939	0.054375751	0.056573156	0.056571332	0.05667345	0.056860471	0.05110722	0.051027343	0.056681975	0.057932132	0.056027182	0.055822297	0.05170061
Himalayan Wolf	0.053813351	0.057118666	0.055971302	0.057345389	0.058429765	0.057481382	0.054887064	0.056365452	0.056663133	0.059278807	0.057427378	0.055506126	0.056357677	0.052429457	0.05752479	0.056235206	0.057307402	0.055882841	0.053355828	0.053749897	0.058264093	0.05965192	0.053925486	0.05372119	0.050879409	0.049708567
Giant Panda	0.056388356	0.053692221	0.05705688	0.055213403	0.055800064	0.056166399	0.054839077	0.05470943	0.053945101	0.05689432	0.05630032	0.056949831	0.057381664	0.054262409	0.052802811	0.055680259	0.056531582	0.053658106	0.05273219	0.054237367	0.058919145	0.054470205	0.057798494	0.055779301	0.05558258	0.054100921	0.055657965
Brown Bear	0.058507132	0.056116598	0.057100851	0.057818324	0.057786495	0.058394119	0.058961926	0.057632598	0.053399551	0.056007043	0.057070601	0.058598817	0.060402055	0.056295021	0.057346991	0.057523757	0.059930338	0.058331259	0.058914122	0.05608334	0.057706656	0.060926068	0.059500471	0.056112352	0.057385346	0.059116768	0.059592061	0.055600751
Polar Bear	0.057771675	0.059664426	0.056203255	0.056918048	0.058704358	0.05814244	0.059555321	0.059041043	0.057094399	0.060847252	0.060280431	0.057872393	0.060654077	0.058017374	0.058897094	0.058260146	0.058718154	0.059734656	0.056246795	0.058144794	0.060251325	0.060717811	0.06026233	0.059958527	0.05911097	0.058740369	0.059708569	0.05747436	0.055226688
Asian Black Bear	0.054362236	0.055277157	0.053464921	0.056157847	0.057788941	0.055553166	0.05683378	0.058125923	0.056960255	0.05906553	0.057526886	0.057428018	0.058530077	0.05556601	0.058058794	0.0554597	0.055620936	0.053356455	0.060194166	0.057686196	0.062705268	0.060700017	0.058794059	0.058371428	0.058122459	0.059380131	0.059702196	0.057575044	0.062644792	0.062579416
Cat	0.053806447	0.05438652	0.054389926	0.055266741	0.055736722	0.057980699	0.056920981	0.058548004	0.058377044	0.059834167	0.056976105	0.056378433	0.056685339	0.057817036	0.055085442	0.05592355	0.057704025	0.057085221	0.059798179	0.05859239	0.06376894	0.060001522	0.060031997	0.056996242	0.057264436	0.059164365	0.059158686	0.056902322	0.062915745	0.064653459	0.048019947
Leopard	0.055770363	0.056014942	0.055199217	0.058374509	0.056541062	0.057963859	0.057564938	0.059354291	0.058649156	0.061248153	0.057761212	0.058473075	0.058097659	0.055789954	0.056314325	0.056334023	0.057482044	0.054737843	0.060545369	0.059337039	0.062718278	0.061832456	0.059769992	0.05853915	0.056034689	0.060523672	0.058578622	0.059026086	0.061875879	0.063293233	0.052490206	0.05243286
Tiger	0.054978462	0.055065578	0.054082732	0.055449908	0.056093055	0.05666879	0.057617301	0.056923235	0.055429251	0.060326171	0.056486758	0.05589656	0.056994267	0.05813611	0.056850382	0.0568746	0.054908825	0.055771532	0.059328395	0.058939727	0.062490765	0.060641615	0.059546183	0.059456764	0.059523177	0.06013402	0.057376147	0.057831668	0.06242822	0.062363589	0.053339178	0.053614353	0.054262147
Bowhead Whale	0.057528828	0.057779317	0.056463387	0.056840616	0.058968104	0.058059052	0.058340741	0.060625967	0.059628537	0.059271258	0.057556638	0.056305429	0.058739607	0.059223642	0.05712986	0.0586286	0.057635384	0.057180747	0.059103622	0.059207357	0.062442647	0.061423886	0.060487889	0.057783821	0.058843219	0.06172157	0.059288079	0.057501042	0.060718767	0.061298815	0.052070407	0.055843445	0.055656159	0.055678617
Gray Whale	0.055496771	0.055412063	0.056562773	0.056950282	0.056755361	0.057356897	0.058589967	0.059069859	0.05875273	0.058088947	0.059813427	0.059698578	0.054949098	0.053952605	0.056804329	0.056982383	0.05825023	0.057956601	0.059192893	0.05977156	0.065753505	0.059909507	0.060096497	0.058330509	0.05749705	0.060844193	0.061155574	0.059248145	0.062315793	0.059456885	0.055196212	0.055815768	0.055603434	0.056462225	0.056716152
North Pacific Right Whale	0.054867609	0.054288497	0.055935856	0.056978706	0.056620678	0.05705901	0.058129088	0.060580017	0.058271441	0.059896489	0.056056778	0.056768614	0.05921068	0.055757612	0.056633157	0.058929207	0.057276101	0.05469374	0.060331794	0.059933642	0.063647347	0.061498902	0.059432185	0.057680892	0.058286629	0.062437724	0.058397767	0.058728056	0.0632998	0.062422078	0.052086745	0.053036376	0.054477693	0.052033383	0.056248849	0.059169027
Indus river Dolphin	0.056413819	0.055669086	0.055838605	0.05556074	0.056028599	0.056958539	0.057706557	0.059004632	0.05863879	0.060260802	0.057257692	0.056492951	0.059567159	0.057748068	0.055832044	0.056339531	0.057475868	0.054568882	0.057608462	0.058836556	0.063191396	0.0586078	0.059444298	0.057715508	0.057652126	0.057127758	0.059702834	0.058072628	0.063010401	0.061974467	0.054627653	0.054240655	0.056015012	0.05556864	0.054820405	0.05428583	0.054307498
Blue Whale	0.053184794	0.054254977	0.054422543	0.054145976	0.05675143	0.05537526	0.056618868	0.05511707	0.057243302	0.059192892	0.055687367	0.055579641	0.056213677	0.053741676	0.055265435	0.054956195	0.053462976	0.053826576	0.056542672	0.057448704	0.061810791	0.059979332	0.059846174	0.055524108	0.056926569	0.058501257	0.058169803	0.055591148	0.060964611	0.059918713	0.053707118	0.051842461	0.053947724	0.051340885	0.05505783	0.054199876	0.050928009	0.053281741
Fin Whale	0.055004992	0.055251912	0.055250627	0.057120622	0.056926483	0.05587	0.059748894	0.058087598	0.059415776	0.06022437	0.057685847	0.057248842	0.060033245	0.057069539	0.056482672	0.058946777	0.056622404	0.056492471	0.058717841	0.057187949	0.063672	0.061699428	0.060597047	0.059318032	0.060742267	0.0626352	0.059075822	0.058137909	0.061343607	0.064055396	0.053875605	0.053014599	0.056760593	0.053323915	0.058039581	0.057852667	0.053260837	0.055113329	0.047103729
European Rabbit	0.061675626	0.05897847	0.061028196	0.059853273	0.060909113	0.062908617	0.059922066	0.060132452	0.057407963	0.060861289	0.060843332	0.061322992	0.061552772	0.05858858	0.062348144	0.063122083	0.063552583	0.060352635	0.058937141	0.057241983	0.059100053	0.061762816	0.061741453	0.060551099	0.060006237	0.060254024	0.063389359	0.059069363	0.056500114	0.058821838	0.067543855	0.068201698	0.068977522	0.067300936	0.067820191	0.067862666	0.066672102	0.06517238	0.064963729	0.06835593
