# Supplementary material for: Compression-Complexity Measures for Analysis and Classification of Coronaviruses
Source: Entropy (Basel). 2022 Dec 31;25(1):81. doi: 10.3390/e25010081 (PMC9857615; doi:10.3390/e25010081)
Supplement: Supplementary file 1 [file entropy-25-00081-s001.zip › SARS_ETC_DistanceMatrix.csv]

Distance Matrix of SARS Corona Viruses Obtained using ETC measure
	SIN2500	SIN2677	SIN2679	SIN2748	SIN2774	BJ01	BJ02	BJ03	BJ04	HKU39849	TOR2	URBANI	CUHKW1	CUHKSu10	GD01	HCoV229E	HCoVNL63	TGEV	TGEVWH1	PEDV	FCoVDF2	MHVJHM	MHVP	MHVM	BCoV	BCoVL	PHEV	PHEVVW572	IBV	TCV
SIN2500
SIN2677	0.04058663
SIN2679	0.042291951	0.061050477
SIN2748	0.055593452	0.049454297	0.048090041
SIN2774	0.047066849	0.05218281	0.036834925	0.053888131
BJ01	0.11425648	0.122442019	0.109140518	0.108117326	0.112210095
BJ02	0.301159618	0.288540246	0.280695771	0.292974079	0.289904502	0.333560709
BJ03	0.227148704	0.23431105	0.230559345	0.248635744	0.242837653	0.274556617	0.124829468
BJ04	0.046043656	0.056957708	0.041950887	0.061391542	0.046725784	0.102319236	0.283424284	0.236016371
HKU39849	0.283424284	0.295361528	0.284106412	0.298431105	0.286834925	0.330491132	0.059345157	0.135402456	0.281718963
TOR2	0.292974079	0.300818554	0.287858117	0.289904502	0.290245566	0.320259209	0.040245566	0.130968622	0.286493861	0.060027285
URBANI	0.28478854	0.2946794	0.292291951	0.28888131	0.292633015	0.326398363	0.048431105	0.130286494	0.281377899	0.051841746	0.048090041
CUHKW1	0.090381992	0.091405184	0.089358799	0.090381992	0.082537517	0.127557981	0.272510232	0.217598909	0.083560709	0.283424284	0.278308322	0.282742156
CUHKSu10	0.082878581	0.089699864	0.079126876	0.098908595	0.083219645	0.128240109	0.275920873	0.214188267	0.087653479	0.268758527	0.278308322	0.273533424	0.041609823
GD01	0.09106412	0.061050477	0.062755798	0.078444748	0.080832196	0.138813097	0.297407913	0.23840382	0.086289222	0.305593452	0.285811733	0.296725784	0.132332879	0.114597544
HCoV229E	0.983287858	0.963506139	0.962141883	0.968281037	0.957025921	0.960777626	0.958390177	0.96521146	0.97271487	0.97680764	0.967939973	0.958390177	0.979536153	0.969304229	0.974079127
HCoVNL63	0.965893588	0.975784447	0.964870396	0.987039563	0.979195089	0.97680764	0.983287858	0.982946794	0.977148704	0.957025921	0.977489768	0.983969986	0.974079127	0.967598909	0.973055935	0.96521146
TGEV	0.961459754	0.959072306	0.950204638	0.950886767	0.971350614	0.971350614	0.96691678	0.974761255	0.956684857	0.940654843	0.96691678	0.954297408	0.970327422	0.974079127	0.961459754	0.964188267	0.949181446
TGEVWH1	0.969986357	0.962824011	0.960777626	0.977489768	0.956343793	0.970327422	0.97680764	0.964870396	0.967939973	0.954638472	0.952592087	0.97100955	0.97271487	0.974079127	0.977148704	0.962482947	0.948499318	0.402796726
PEDV	0.995225102	0.977148704	0.973396999	0.968622101	0.970327422	0.976466576	0.979877217	0.974761255	0.974761255	0.979195089	0.998294679	0.992155525	0.971350614	0.97100955	0.968622101	0.983287858	0.962824011	0.946793997	0.975443383
FCoVDF2	0.975102319	0.974079127	0.957025921	0.959754434	0.963506139	0.951568895	0.960777626	0.986016371	0.959072306	0.96111869	0.958390177	0.973055935	0.958731241	0.972373806	0.974079127	0.992837653	0.938608458	0.944406548	0.939631651	0.954297408
MHVJHM	0.97851296	0.975784447	0.955661664	0.978854025	0.966234652	0.967257844	0.964188267	0.965552524	0.977489768	0.970327422	0.97851296	0.96111869	0.979536153	0.990791269	0.975102319	0.982946794	0.987380628	0.977830832	0.991473397	0.975443383	0.964870396
MHVP	0.968622101	0.959754434	0.964188267	0.961800819	0.979877217	0.973055935	0.967939973	0.958049113	0.976125512	0.967257844	0.962141883	0.975102319	0.974079127	0.966234652	0.977489768	0.969304229	0.976466576	0.994542974	0.966575716	0.982264666	0.98431105	0.939631651
MHVM	0.97680764	0.969645293	0.970327422	0.980218281	0.97680764	0.971350614	0.969645293	0.986016371	0.96521146	0.963847203	0.986016371	0.999658936	0.979877217	0.977830832	0.972373806	0.974079127	0.986016371	0.98431105	0.981241473	0.965552524	0.969304229	0.651773533	0.943383356
BCoV	0.973055935	0.981582538	0.962824011	0.953274216	0.969304229	0.965893588	0.968622101	0.950886767	0.954979536	0.96521146	0.975102319	0.977148704	0.960777626	0.967598909	0.961800819	0.977489768	0.983628922	0.971691678	0.983969986	1	0.98260573	0.975102319	0.954297408	0.981923602
BCoVL	0.957366985	0.967257844	0.975784447	0.941336971	0.969645293	0.956684857	0.962824011	0.981582538	0.964870396	0.979877217	0.95361528	0.979195089	0.94781719	0.96521146	0.96111869	0.973055935	0.991132333	0.977830832	0.957366985	0.980559345	0.964870396	0.985675307	0.97100955	0.973396999	0.079126876
PHEV	0.953274216	0.967939973	0.946793997	0.960436562	0.968281037	0.953274216	0.973396999	0.980559345	0.944747613	0.97271487	0.954979536	0.958390177	0.96521146	0.956684857	0.963847203	0.968622101	0.97851296	0.980559345	0.972032742	0.979536153	0.970668486	0.97271487	0.97100955	0.975102319	0.488062756	0.528649386
PHEVVW572	0.963847203	0.966575716	0.949181446	0.964188267	0.955661664	0.966575716	0.959754434	0.961459754	0.957025921	0.958390177	0.940313779	0.961800819	0.973738063	0.957366985	0.967598909	0.977830832	0.971691678	0.960777626	0.967257844	0.996589359	0.972373806	0.977148704	0.956002729	0.967257844	0.493860846	0.523874488	0.041609823
IBV	0.979536153	0.96691678	0.951568895	0.97851296	0.98431105	0.978854025	0.974079127	0.975443383	0.981582538	0.976466576	0.982264666	0.965893588	0.95941337	0.966234652	0.96691678	0.967257844	0.942701228	0.958731241	0.954638472	0.968622101	0.967598909	0.983628922	0.983969986	0.983628922	0.976125512	0.981241473	0.983628922	0.983969986
TCV	0.967939973	0.984652115	0.977489768	0.960436562	0.96521146	0.970327422	0.969986357	0.982264666	0.96111869	0.973738063	0.97680764	0.970668486	0.975443383	0.972032742	0.977489768	0.976125512	0.944747613	0.993519782	0.96691678	0.971691678	0.95941337	0.967939973	0.998635744	0.975443383	0.984652115	0.977830832	0.961459754	0.978854025	0.669849932
