# Supplementary material for: Compression-Complexity Measures for Analysis and Classification of Coronaviruses
Source: Entropy (Basel). 2022 Dec 31;25(1):81. doi: 10.3390/e25010081 (PMC9857615; doi:10.3390/e25010081)
Supplement: Supplementary file 1 [file entropy-25-00081-s001.zip › SARS_LZC_DistanceMatrix.csv]

Distance matrix of SARS Coronviruses obtained using LZC measure
	SIN2500	SIN2677	SIN2679	SIN2748	SIN2774	BJ01	BJ02	BJ03	BJ04	HKU39849	TOR2	URBANI	CUHKW1	CUHKSu10	GD01	HCoV229E	HCoVNL63	TGEV	TGEVWH1	PEDV	FCoVDF2	MHVJHM	MHVP	MHVM	BCoV	BCoVL	PHEV	PHEVVW572	IBV	TCV
SIN2500
SIN2677	0.1129
SIN2679	0.0965	0.1081
SIN2748	0.1033	0.0965	0.1062
SIN2774	0.0965	0.1062	0.1014	0.1081
BJ01	0.1795	0.1757	0.1844	0.1882	0.1699
BJ02	0.4971	0.5019	0.4903	0.5097	0.4952	0.5772
BJ03	0.3977	0.4073	0.3909	0.4170	0.4093	0.4730	0.1969
BJ04	0.0985	0.1120	0.0985	0.1023	0.0985	0.1776	0.4971	0.4035
HKU39849	0.4971	0.5116	0.4971	0.4894	0.4903	0.5608	0.0994	0.2008	0.4855
TOR2	0.4865	0.5116	0.4923	0.5058	0.4836	0.5598	0.1004	0.1959	0.4932	0.0985
URBANI	0.4971	0.5116	0.4942	0.5068	0.5048	0.5714	0.1014	0.1931	0.4875	0.0965	0.0975
CUHKW1	0.1014	0.1158	0.1062	0.1207	0.1052	0.1979	0.4778	0.3716	0.1052	0.4749	0.4768	0.4691
CUHKSu10	0.1023	0.1216	0.1091	0.1129	0.1100	0.1931	0.4846	0.3832	0.1042	0.4720	0.4807	0.4797	0.0975
GD01	0.1506	0.1322	0.1322	0.1438	0.1554	0.2153	0.5039	0.4054	0.1313	0.4884	0.5058	0.5058	0.1680	0.1554
HCoV229E	0.9730	0.9788	0.9739	0.9720	0.9739	0.9681	0.9807	0.9672	0.9662	0.9788	0.9749	0.9730	0.9788	0.9817	0.9768
HCoVNL63	0.9527	0.9575	0.9759	0.9633	0.9498	0.9681	0.9633	0.9527	0.9537	0.9672	0.9624	0.9662	0.9681	0.9710	0.9527	0.9363
TGEV	0.9797	0.9662	0.9595	0.9691	0.9710	0.9585	0.9855	0.9739	0.9778	0.9730	0.9720	0.9643	0.9720	0.9730	0.9778	0.9720	0.9739
TGEVWH1	0.9797	0.9923	0.9826	0.9575	0.9894	0.9730	0.9643	0.9778	0.9923	0.9865	0.9749	0.9739	0.9836	0.9768	0.9672	0.9720	0.9633	0.6795
PEDV	0.9730	0.9720	0.9865	0.9865	0.9672	0.9884	0.9990	0.9855	0.9807	0.9884	0.9826	0.9797	0.9846	0.9913	0.9807	0.9807	0.9768	0.9730	0.9681
FCoVDF2	0.9855	0.9681	0.9836	0.9807	0.9884	0.9614	0.9691	0.9720	0.9710	0.9817	0.9759	0.9855	0.9913	0.9730	0.9624	0.9614	0.9431	0.9575	0.9276	0.9846
MHVJHM	0.9768	0.9826	0.9739	0.9942	0.9865	0.9903	0.9788	0.9681	0.9778	0.9710	0.9768	0.9903	0.9884	0.9826	0.9855	0.9768	0.9768	0.9865	0.9778	0.9807	0.9807
MHVP	0.9817	0.9691	0.9701	0.9817	0.9759	0.9990	0.9807	0.9633	0.9739	0.9836	0.9662	0.9633	0.9826	0.9913	0.9653	0.9691	0.9585	0.9585	0.9653	0.9633	0.9768	0.9151
MHVM	0.9952	0.9720	0.9855	0.9826	1.0000	0.9952	0.9913	0.9952	0.9836	0.9875	0.9739	0.9865	0.9903	0.9662	0.9817	0.9701	0.9575	0.9749	0.9797	0.9807	0.9923	0.7519	0.9141
BCoV	0.9653	0.9807	0.9768	0.9537	0.9681	0.9566	0.9653	0.9681	0.9710	0.9633	0.9517	0.9614	0.9749	0.9681	0.9691	0.9527	0.9517	0.9643	0.9807	0.9653	0.9720	0.9633	0.9556	0.9527
BCoVL	0.9527	0.9681	0.9450	0.9768	0.9672	0.9537	0.9826	0.9479	0.9517	0.9691	0.9759	0.9672	0.9537	0.9836	0.9517	0.9556	0.9488	0.9585	0.9788	0.9855	0.9575	0.9797	0.9624	0.9710	0.1062
PHEV	0.9681	0.9556	0.9624	0.9595	0.9681	0.9788	0.9527	0.9633	0.9672	0.9691	0.9826	0.9498	0.9817	0.9633	0.9653	0.9749	0.9440	0.9710	0.9653	0.9720	0.9691	0.9846	0.9575	0.9739	0.4797	0.4469
PHEVVW572	0.9672	0.9633	0.9556	0.9778	0.9749	0.9826	0.9662	0.9720	0.9653	0.9585	0.9749	0.9566	0.9730	0.9749	0.9788	0.9517	0.9353	0.9739	0.9517	0.9846	0.9730	0.9730	0.9527	0.9788	0.4498	0.4431	0.0965
IBV	0.9730	0.9759	0.9614	0.9826	0.9778	0.9653	0.9604	0.9759	0.9604	0.9720	0.9817	0.9672	0.9681	0.9730	0.9585	0.9710	0.9402	0.9498	0.9653	0.9788	0.9546	0.9768	0.9778	0.9768	0.9633	0.9681	0.9595	0.9575
TCV	0.9942	0.9768	0.9730	0.9759	0.9817	0.9710	0.9807	0.9739	0.9788	0.9604	0.9749	0.9759	0.9749	0.9884	0.9739	0.9730	0.9411	0.9556	0.9643	0.9923	0.9566	0.9788	0.9846	0.9817	0.9653	0.9575	0.9672	0.9643	0.5743
